# Supplementary material
Source: PubMed Central journal article supplement (PMC9249878)
Supplement: 41467_2022_31532_MOESM1_ESM.pdf [file 41467_2022_31532_MOESM1_ESM.pdf]

**Supplementary Information:**

**Many dissimilar NusG protein domains switch between  $\alpha$ -helix and  $\beta$ -sheet folds**

L. L. Porter *et al.*

Supplementary Figure 1

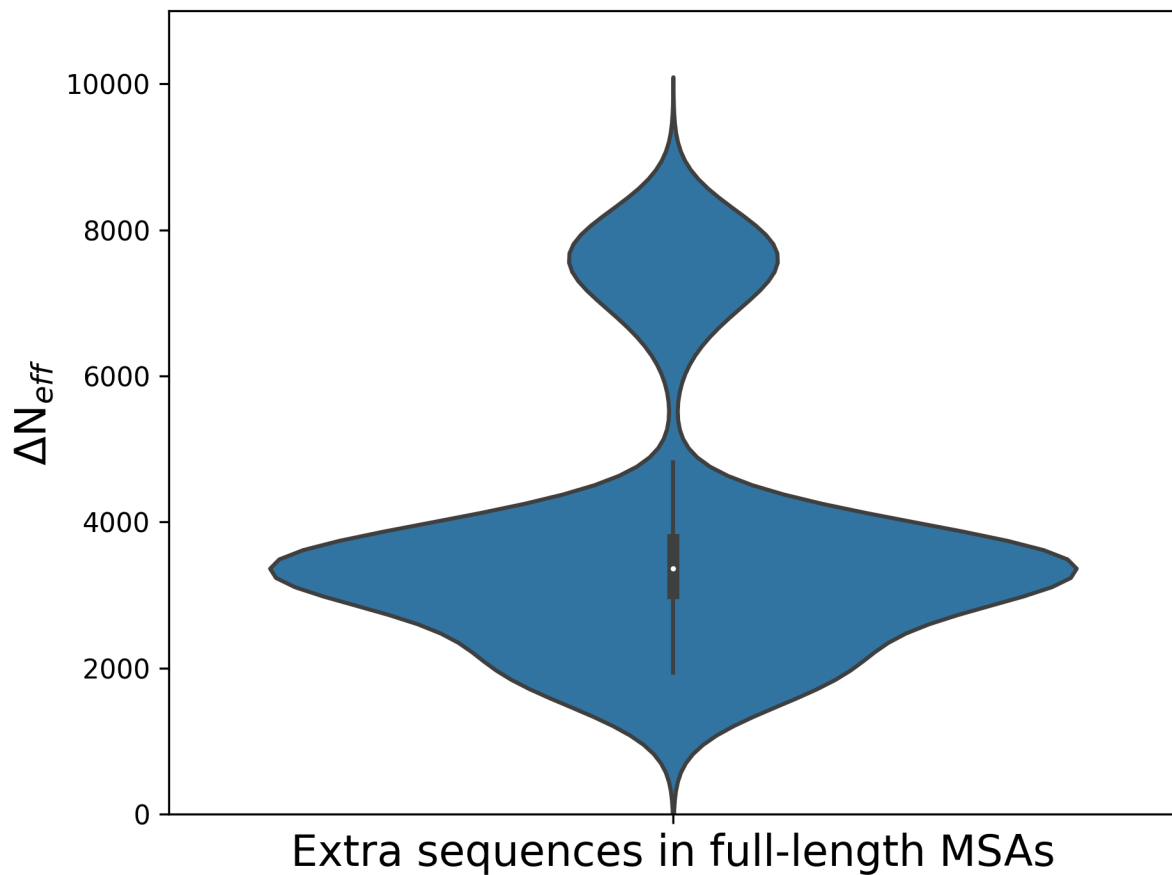

Violin plot of MSA depth differences between full-length NusG and NusG<sup>SP</sup> sequences and their corresponding CTD sequences. Mean/median full-length MSAs are effectively 3842/3368 sequences deeper than those from their corresponding CTDs. MSA depths were calculated as  $N_{eff}^1$  (Methods). Bold black line spans upper and lower quartiles, thinner black line spans upper/lower extremes; white dot corresponds to median  $\Delta N_{eff}$  value (3368).

Supplementary Figure 2

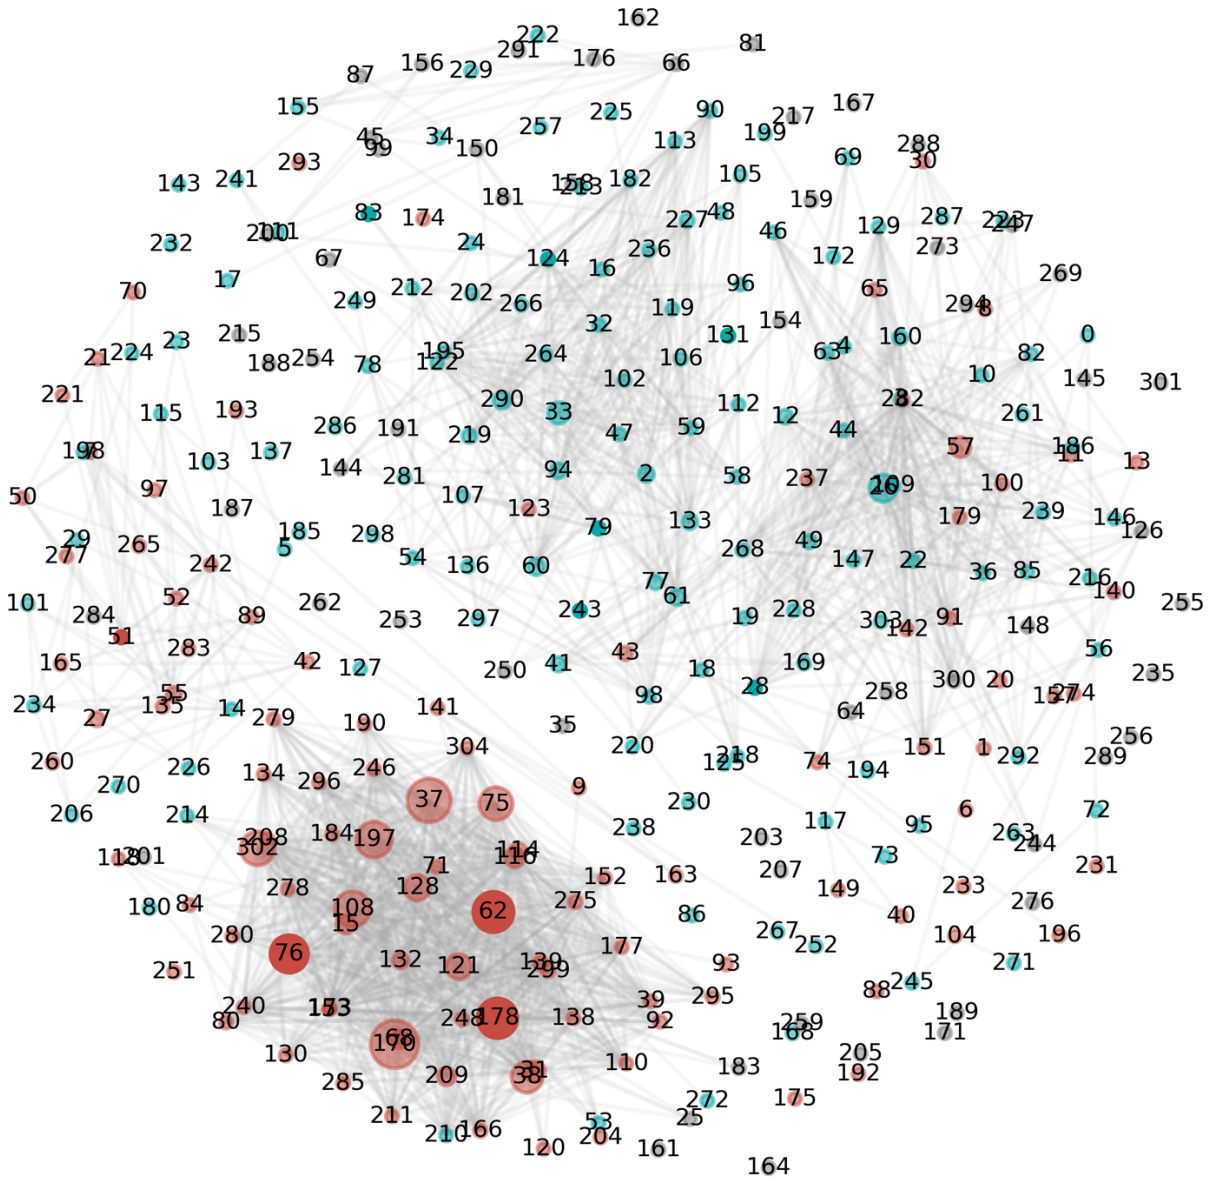

Sequence space diagram with cluster numbers labeled. Numbers correspond to the Cluster IDs (column 3) in Supplementary Data 1.

Supplementary Figure 3

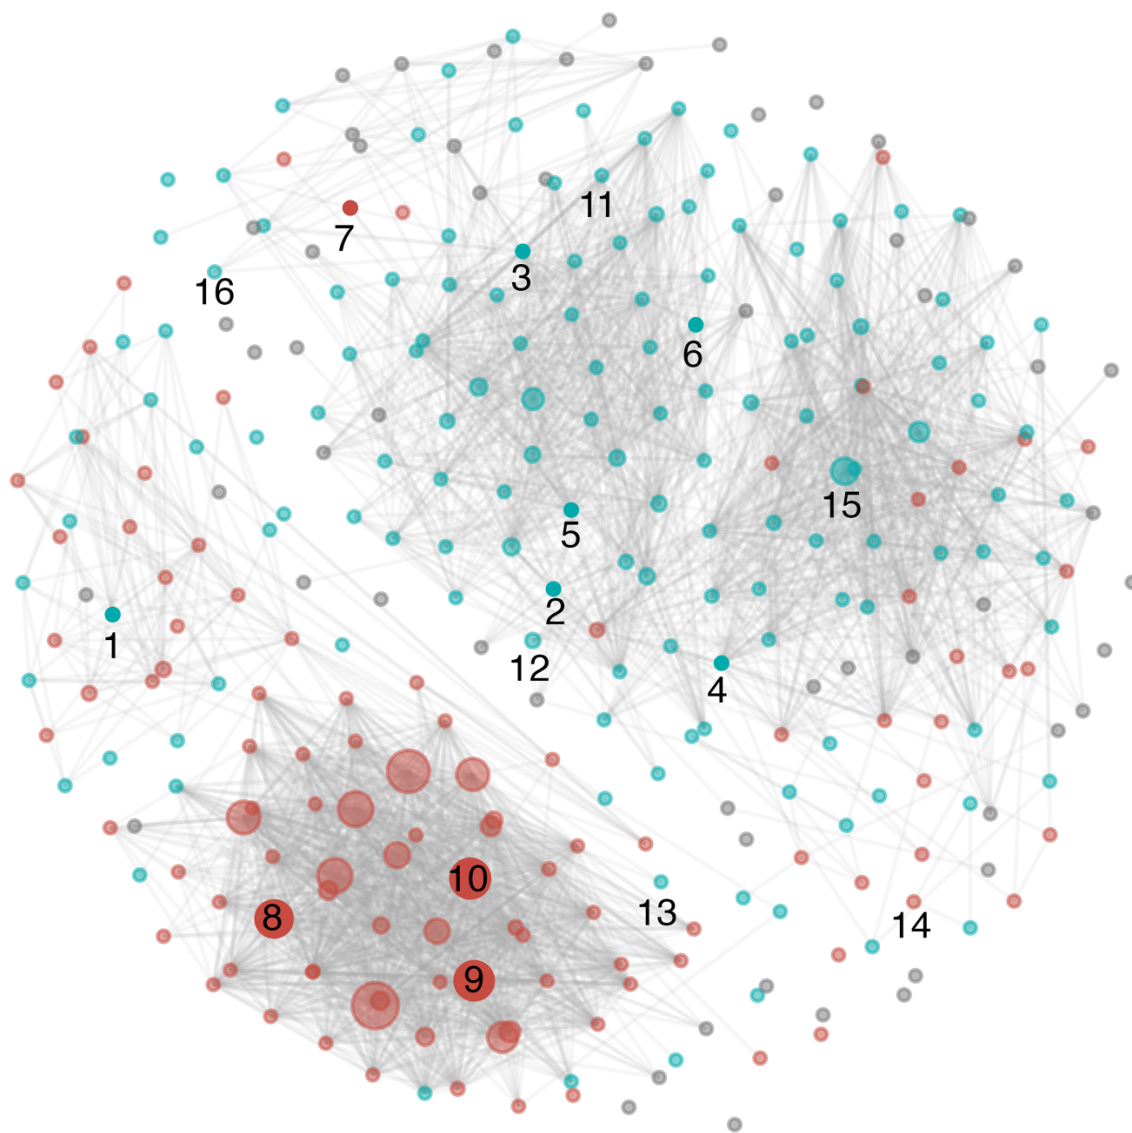

All sequence space constructs tested. Constructs 1-10 are labeled as in Fig. 2. Constructs 11-16 were tested, but CD spectra could not be obtained because they did not express (Constructs 11-13 and 15-16) or because they were insoluble (Construct 14). With the exceptions of Constructs 8-10, all labels are directly below the nodes from which sequences were selected. Teal/red nodes: predicted to/not to switch folds on average; no high-confidence predictions were made for gray nodes. More information about each construct can be found in Supplementary Table 1. Nodes 1 and 7 were colored differently from their average predictions (single folding, Node 1; fold-switching, Node 7) to highlight the prediction of the sequence validated experimentally, which differed from the average.

## Supplementary Figure 4

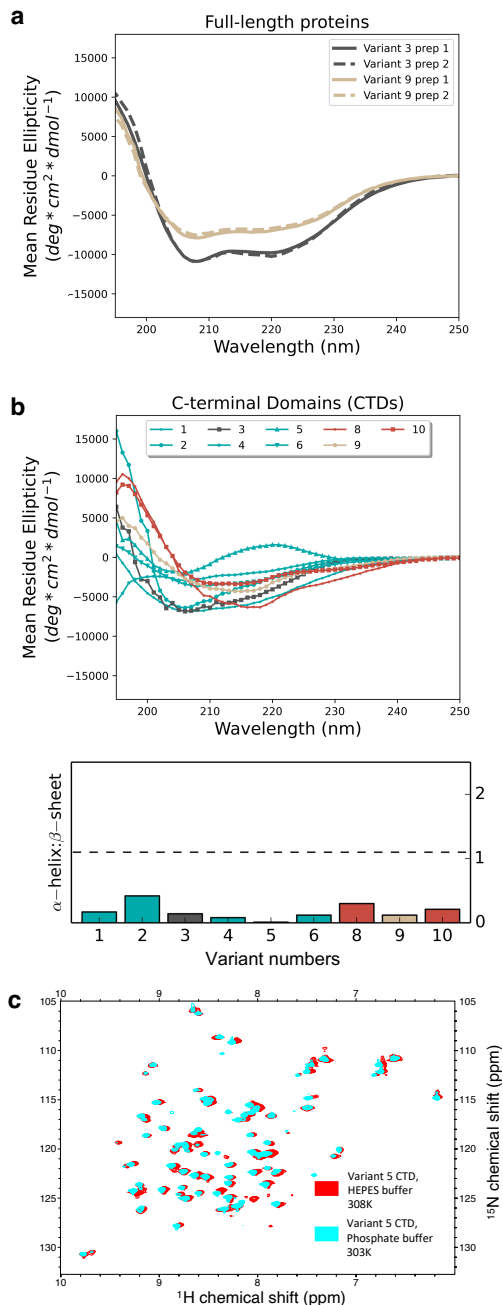

(a) Far-UV circular dichroism (CD) spectra of two different *E. coli* RfaH preps differ significantly from two different *E. coli* NusG preps. By contrast, CD spectra of the two different preps of both RfaH and NusG are nearly identical to one another. (b) Far-UV CD spectra of 9 CTDs fold predominantly into  $\beta$ -sheets. Spectra are shown above and estimated secondary structures shown below. Reference spectra of *E. coli* RfaH (Variant 3) and *E. coli* NusG (Variant 9) are colored gray and beige, respectively. All variants were estimated to have 27.3% (2)-43.0% (3)  $\beta$ -strand content, while  $\alpha$ -helical content ranged from 0.0% (4 and 5)-8.4% (2). Secondary structure content was estimated by the BestSel server<sup>2</sup>. Variant numbers correspond to those in Fig. 2. Dotted line represents the helix:strand ratio of *E. coli* RfaH (variant 3), whose structure is known and whose CD spectrum has the lowest helical content of all 6 variants. (c) Variant 5 CTD assumes the same fold under different buffer conditions and temperatures. The 2D  $^1\text{H}$ - $^{15}\text{N}$  HSQCs of Variant 5 CTD under different conditions are nearly superimposable. Conditions from Fig. 2c (red, 25 mM HEPES, 50 mM NaCl, 5% glycerol, pH 7.5, T=308K) overlays with the 2D  $^1\text{H}$ - $^{15}\text{N}$  HSQC of Variant 5 CTD, whose resonances were assigned (cyan, 100 mM potassium phosphate, pH 7.4, T=303K). Source data are provided as a Source Data file.

Supplementary Figure 5

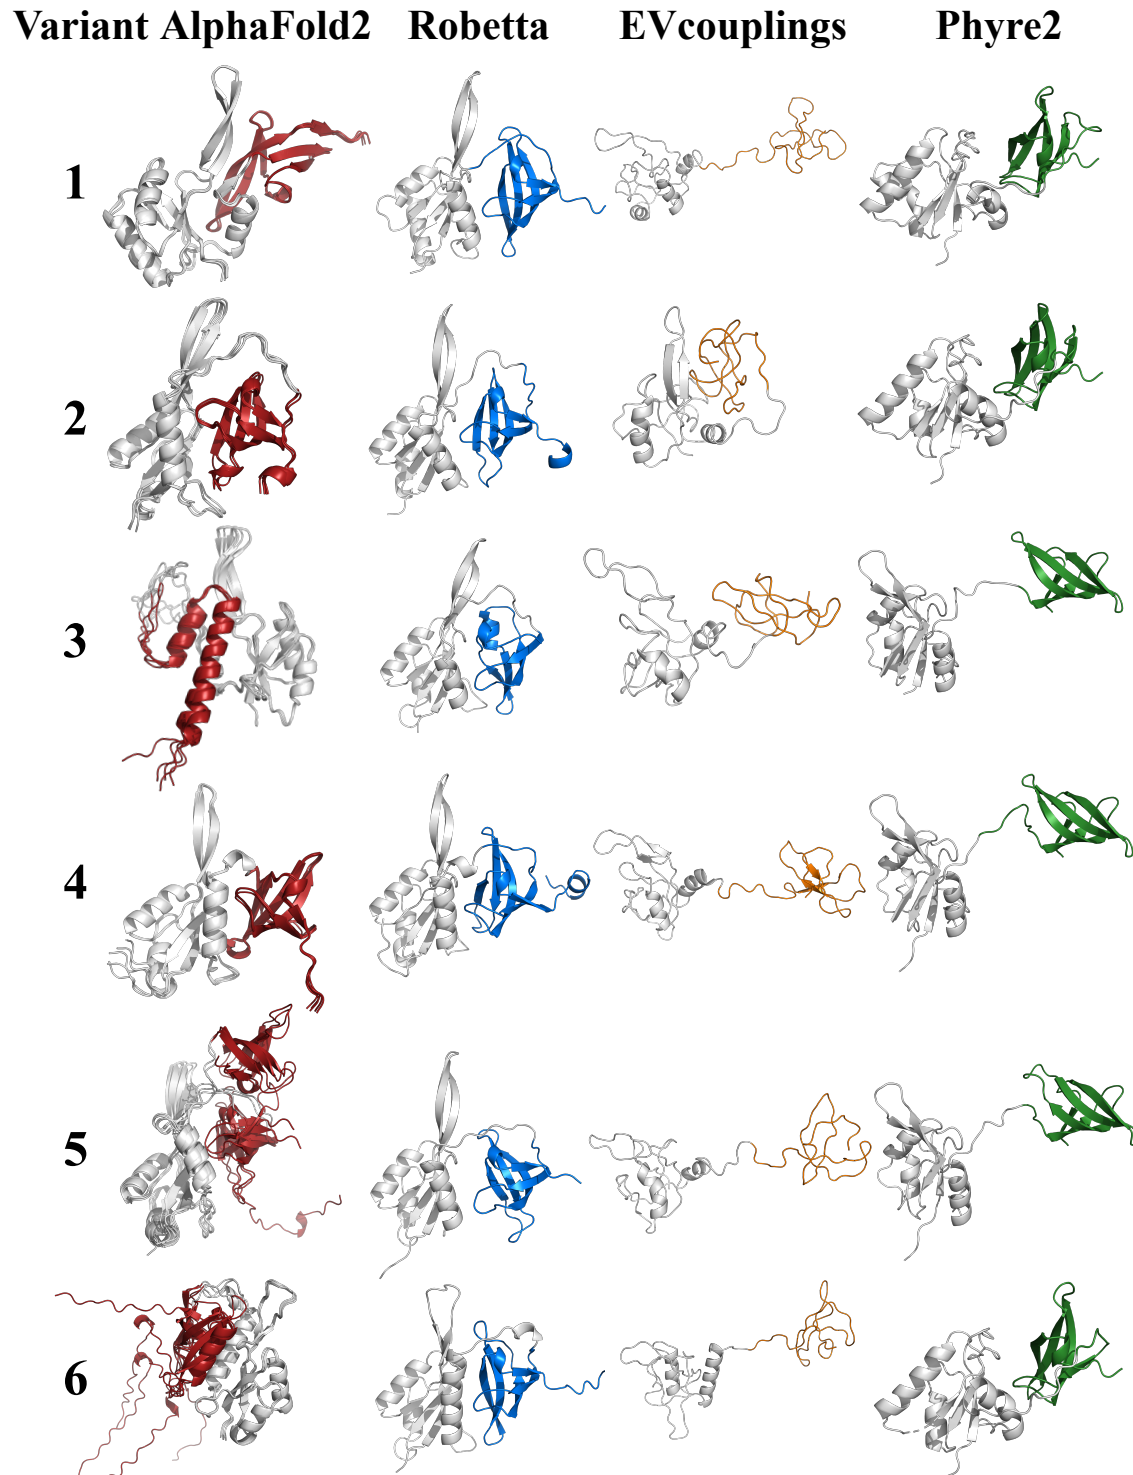

CTDs of the lowest-energy models for 6 proteins with RfaH-like folds (helical hairpin) are predicted assume  $\beta$ -sheet folds, including *E. coli* RfaH (Construct 3), which has an experimentally validated structure. CTDs are colored burgundy (AlphaFold2), blue (Robetta), orange (EVcouplings), green (Phyre2). Variant numbers correspond to those in Fig. 2. Top 5 AlphaFold2 models are homogeneous enough to be shown; other models are not.

Supplementary Figure 6

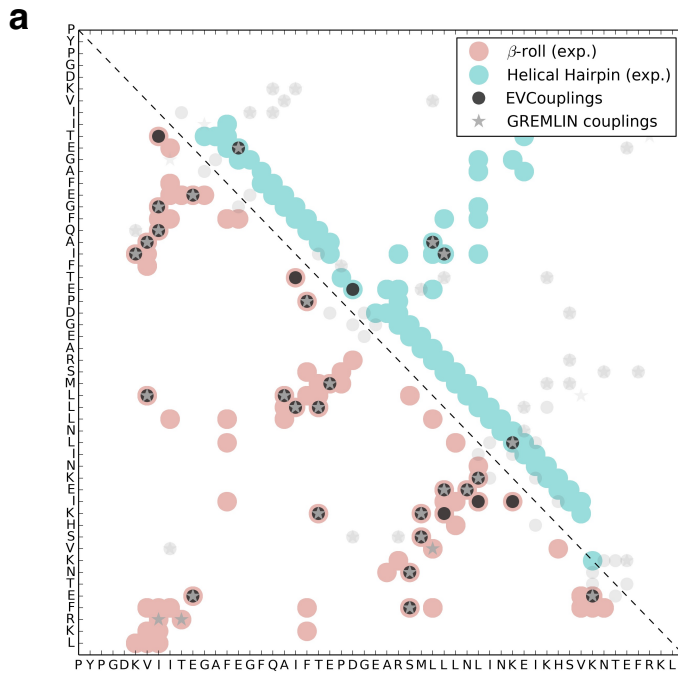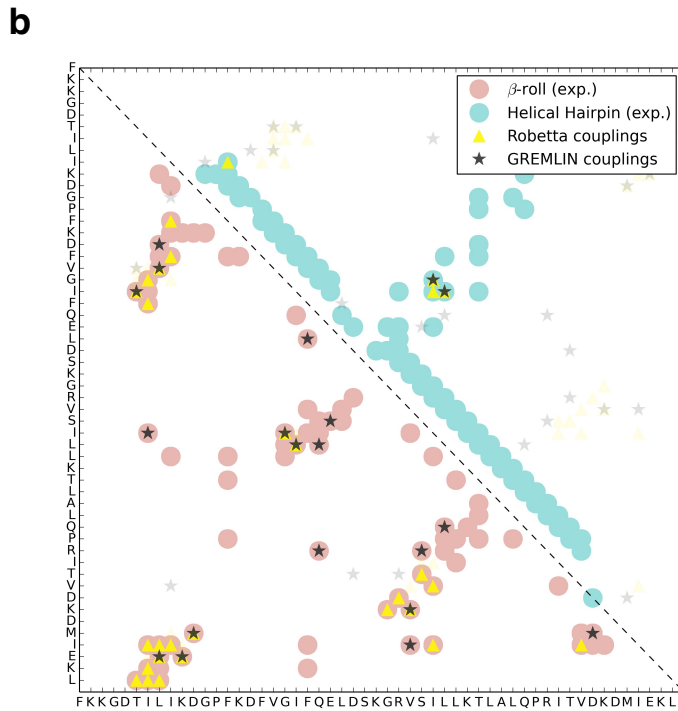

GREMLIN couplings calculated from EVCouplings (a) and Robetta (b) sequence alignments largely match contacts from the experimentally determined  $\beta$ -roll fold (red, PDB ID 2LCL) but did not match any contacts unique to the helical hairpin fold (teal, PDB ID 5OND\_A). Source data are provided as a Source Data file.

Supplementary Figure 7

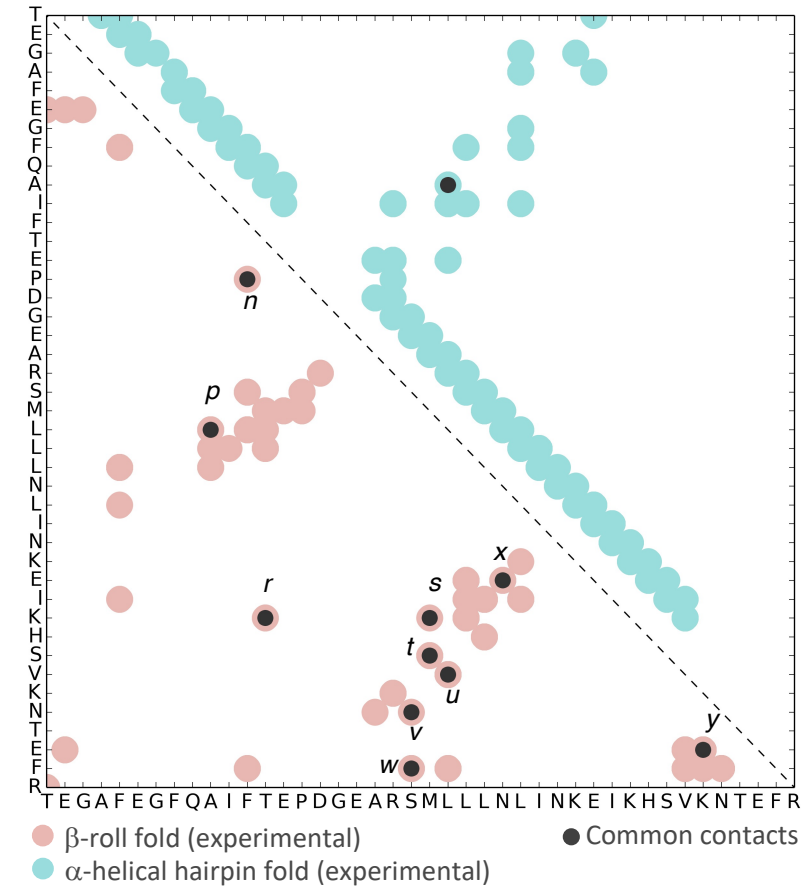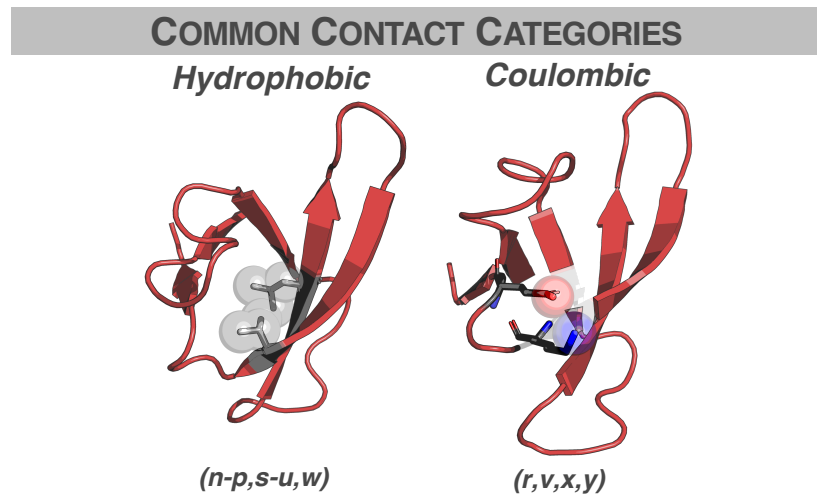

The single-fold paradigm biases protein structure predictions. EVCouplings and Robetta identify conserved residue-residue contacts (gray circles) corresponding to the  $\beta$ -roll fold of *E. coli* RfaH (PDB ID: 2LCL\_A, red circles) but not the  $\alpha$ -helical hairpin fold (PDB ID: 5OND\_A, teal circles). Italicized letters correspond to individual contacts observed in the  $\beta$ -roll fold. The only helical contact identified is also a contact in the  $\beta$ -roll fold (contact *q*); its helical form is contact *i* in Fig. 3. Contact categories and their corresponding letters are shown below. Source data are provided as a Source Data file.



Supplementary Figure 8

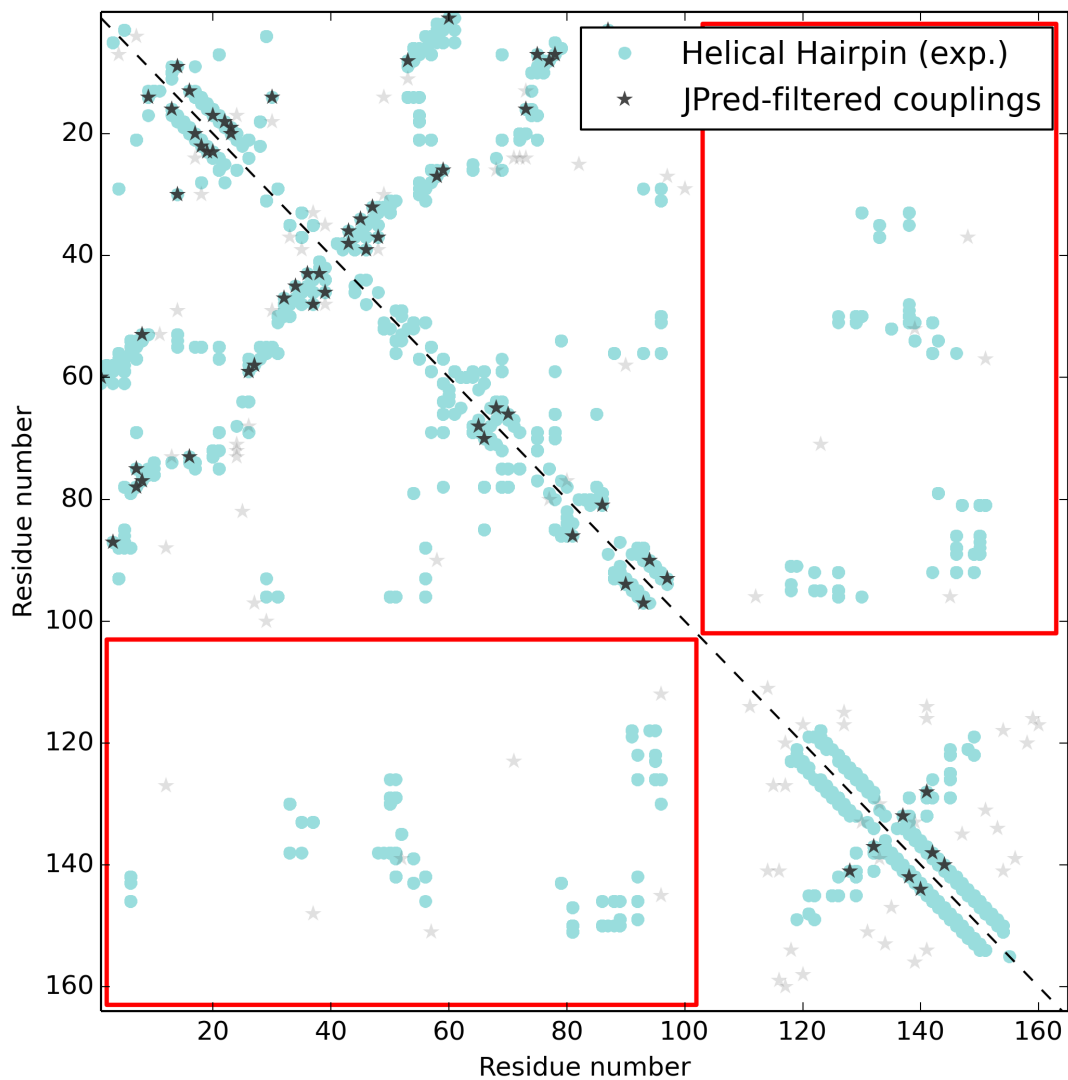

JPred-filtered couplings of putative full-length fold switchers calculated by GREMLIN. No interdomain contacts (found within red boxes) were consistent with the experimentally determined structure of full-length RfaH (PDB ID: 5OND\_A). Source data are provided as a Source Data file.

Supplementary Table 1. Sequences of all variants tested (see also Supplementary Figure 3).

| #  | ID                                         | Cluster | Annotation                        | Phylum/Class               | Pred       | %H<->E | Express? | Soluble? |
|----|--------------------------------------------|---------|-----------------------------------|----------------------------|------------|--------|----------|----------|
| 1  | UPI000E4E22B5                              | 51      | LoaP                              | Firmicutes                 | FS         | 9%     | Y        | Y        |
| 2  | A0A0S4NBF0                                 | 243     | RfaH                              | Candidatus Kryptonia       | FS         | 53%    | Y        | Y        |
| 3  | Q0TAL4                                     | 124     | RfaH                              | Gammaproteobacteria        | FS         | 44%    | Y        | Y        |
| 4  | B3EDK9                                     | 28      | NusG                              | Chlorobi                   | FS         | 7%     | Y        | Y        |
| 5  | A0A2J6WKD6                                 | 79      | NGN domain-containing protein     | Deferribacteres            | FS         | 81%    | Y        | Y        |
| 6  | E8N6B2                                     | 131     | Putative RfaH                     | Chloroflexi                | FS         | 50%    | Y        | Y        |
| 7  | Q9F769                                     | 83      | UpbY                              | Bacteroidetes              | NFS        | 2%     | Y        | Y        |
| 8  | <a href="#">CUU00518.1</a><br>(A0A0PILTF1) | 76      | NusG                              | Candidatus Kryptonia       | NFS        | 0%     | Y        | Y        |
| 9  | P0AFG0<br>(A0A077QHU1)                     | 178     | NusG                              | Gammaproteobacteria        | NFS        | 0%     | Y        | Y        |
| 10 | A0A1W1XWG8                                 | 62      | NusG                              | Deltaproteobacteria        | NFS        | 0%     | Y        | Y        |
| 11 | <i>A1VS04</i>                              | 105     | <i>NusG</i>                       | <i>Betaproteobacteria</i>  | <i>FS</i>  | 65%    | <i>N</i> | -        |
| 12 | <i>A0A1W1XVU0</i>                          | 41      | <i>NusG</i>                       | <i>Deltaproteobacteria</i> | <i>NFS</i> | 0%     | <i>N</i> | -        |
| 13 | <i>A0A348AQW0</i>                          | 86      | <i>RfaH</i>                       | <i>Firmicutes</i>          | <i>FS</i>  | 30%    | <i>N</i> | -        |
| 14 | <i>Q984H9</i>                              | 40      | <i>Mr7998</i>                     | <i>Alphaproteobacteria</i> | <i>FS</i>  | 38%    | <i>Y</i> | <i>N</i> |
| 15 | <i>A0A1M6KQH4</i>                          | 26      | <i>NusG</i>                       | <i>Bacteroidetes</i>       | <i>FS</i>  | 37%    | <i>N</i> | -        |
| 16 | <i>A0A0F6QDM6</i>                          | 17      | <i>RfaH</i> (on <i>actX</i> gene) | <i>Gammaproteobacteria</i> | <i>FS</i>  | 57%    | <i>N</i> | -        |

Supplementary Table 2. Sequences of all variants successfully purified and characterized by circular dichroism. FS indicates predicted fold switcher: Y means Yes, N means No.

| Variant | FS | Sequence                                                                                                                                                                                                   |
|---------|----|------------------------------------------------------------------------------------------------------------------------------------------------------------------------------------------------------------|
| 1       | Y  | MMKPWYVLYVMGGKEQKILSLLNKGEDIKAFTPWKEVMHRVQGKRILVKKPLFPSPYVFLFLE<br>TELDPAVVFHQKLMMLYKSQINGILKELKYEDDISALHTEERAYLEGLMDEEHNVRLSKGEI<br>LDGEVITIEGPLKGYESNIIRIDRHKRRAILNVRMNNQDLQVDVSLIVKKIESQK               |
| 2       | Y  | MDLNWYVLQTKPKQENLVESYLNLANIEVFNPKIQEIRYIGEKRRKITVLLFPCYVFAKL<br>NPSLFDLVIYTRGVRKILGVNGRPKPIKESIETIKERIRENSYIYVPENYEEFQLCQGD<br>YVVVVVDGPLKGFAGIVERINGSKAIVMLISMDYQVKADIPKFLLRKVDPEILE                      |
| 3       | Y  | MQSWYLLYCKRQQLQRAQEHLERQAVNCLAPMITLEKIVRGKRTAVSEPLFPNYLFFVEFDP<br>EVIHTTTINATRGVSHFVRFVGFASPAIVPSAVIHQLSVYKPKDIVDPATPYPGDKVITIEGA<br>FEGFQAI FTPEPDGEARSMLLLNLINKEIKHSVKNTFRKL                             |
| 4       | Y  | MKVTDRNSCWYAVYVRSRYEKKVHRMFLEKEVEAFLPLETWRQWSDRKKKVSEPLFRGY<br>VFNIDMKAEHKVLDTDGVVKFIGIGKTPSVISSRDIDWIKKLVREPDARRIVASLPP<br>GQKVMVTAGPFKGLEGVVKEGRESRLVVYFDRIMQGIEVSIYPELLSPIHAVGTEEQNE<br>TGFY            |
| 5       | Y  | MESFLNWYLIYTKVKKEDYLEQLLTEAGLEVLNPKIKKTKTVRNKKKEVIDPLFPCYLFV<br>KADLNVHLRIISYQIGIRRLVGGSNPTIVPIEIIDTIKSRMVDGFIIDTKSEEFKKGDTIL<br>IKDGPFKDFVGI FQEELDSKGRVSI LLKTLALQPRI TVDKDMIEKLN                        |
| 6       | Y  | MSKKWYAIQSKPNKEQALCEQFQSRGIEVFYFQIRVNPVNPRARKIRPYFPGYLFVHVDL<br>DEVGLSVIRWIPFARGVVSFSNEPASVPDNLIEAIRRVDEVNRAGGELLETLKPGEPVL<br>IQEGPFAGYEAIFDVRLSGKERVRVLIQLLSQRYIPVEMQVGSLSKPLKTKNKDKPHPL                 |
| 7       | N  | MSEQQKYWFAARTRDKQEFAIRDSLEKLTTELNLNYLPTQFVIRQLKYRRKRVEVPVIK<br>NLIFIQATKQDACDISNKYNIQLFYMKDLLTRAMLIVPDKQMDFIFVMDLDPNGVSDN<br>DHLVSGSRVQVVKGDFCGVEGELASEANKTYVVIIRIAGVLSASVKVPKSYLRVI                       |
| 8       | N  | MARRWYAVRTYSGHENRVKKFIEENIAEGKFKDKIFNVLPVTEKVTVVREGRKKSRVKAF<br>FPGYILIEAEMDDEVKNFIRAVPSVVSFVGPKGNPVPLREDEVERFIGKPEGAELERIDV<br>PFRVGDVSVKVIDGPF TDFSGVVQEVNSEKMKLVMINIFGRKTPVELDFTQVEIEK                  |
| 9       | N  | MSEAPKKRWYVVQAFSGFEGRVATSLREHIKLNMEDLFGVEMVPTVEEVVEIRGGQRRKS<br>ERKFFPGYVLVQVMNDASWHLVRSVPRVMGFIGGTSRDPAPISDKEVDAIMNRLQQVGD<br>KPRPKTLFEPGEMVRVNDGPFADFNQVVEVDYEKSRKLVSVSIFGRATPVELDFSQVEK<br>A            |
| 10      | N  | MRMDEGLSRSGDRVAKQWYIVHTYSGFEHRVKAALQERIKAAAGKEEYFGQILVPTKEVV<br>ELVKGERKSSSRKFYPGYIVVEMELNDETWHLVRHTPKVTGFIGSQERPIPLSEEEANAI<br>IQQMEEGIQKPRPKYQFEKGEEVVRVVDGPFASFNGVVEQVIPEKGVRLVLTIFGRSTPV<br>ELDFVQIQRL |

Supplementary Table 3. Sequences of CTDs whose CD spectra were collected. See also Supplementary Fig. 4. These are also the sequences of the Variant 5 and 8 CTDs used for NMR. FS indicates predicted fold switcher: Y means Yes, N means No.

| CTD Variant | FS | Sequence                                                                                |
|-------------|----|-----------------------------------------------------------------------------------------|
| 1           | Y  | TSLSKGEILDGEVIIITEGPLKGYESNIIRIDRHKRRAILNVRMNNQDLQVDVSLEIVKKIESQK                       |
| 2           | Y  | TSWIKERIRENSYIYVPENYEEFQLCQGDYVVVVVDGPLKGFAGIVERINGSKAIVMLISMDYQV<br>KADIPKFLLRKVDPEILE |
| 3           | Y  | LSVYPKDIVDPATPYPGDKVIIITEGAFEGFQAI FTEPDGEARSMLLLNLINKEIKHSVKNTEFR<br>KL                |
| 4           | Y  | TSRIVASLPPGQKVMVTAGPFKGLGEGVVVKEGRESRLVVVYFDRIMQGIEVSIYPELLSPIHAVG<br>TEEQNETGFY        |
| 5           | Y  | MVDGFIDTKSEEFKKGDTILIKDGPFKDFVGIFQEELDSKGRVSI LLKTL<br>ALQPRITVDKDMIEKLHN               |
| 6           | Y  | TSWELLETLKPGEPVLIQEGPFAGYEAFDVRLSGKERVRVLIQLLSQRYIPVEMQVGS LKPLK<br>TKNKDKPHPL          |
| 7           | N  | TSWFDNDHLSVGSRVQVVKGDFCGVEGELASEANKTYVVIRIAGVLSASVKVPKSYLRVI                            |
| 8           | N  | AELERIDVPPFRVGD SVKVIDGPFTDFSGVVQEVNSEKMKLKVMINIFGRK<br>TPVELDFTQVEIEK                  |
| 9           | N  | TSWRPKTLFEPGEMVRVNDGPFADFNQVVEVDYKSR LKVSVSIFGRATPVELDFSQVEKA                           |
| 10          | N  | TSRPKYQFEKGEEVRVVDGPFASFNGVVEQVIPEK GKVRVLVTIFGRSTPVELDFVQIQRL                          |

Supplementary Table 4. Oligonucleotide sequences used to make C-terminal domain constructs.

| Primer Name        | Oligonucleotide sequence  |
|--------------------|---------------------------|
| Variant 1 Forward  | AGCCTGAGCAAAGGTGAAATTC    |
| Variant 1 Reverse  | AGTCAAAGCTTTGAAGAGCTTG    |
| Variant 2 Forward  | CTGGATCAAAGAGCGCATTCG     |
| Variant 2 Reverse  | CTAGTCAAAGCTTTGAAGAGCTTG  |
| Variant 3 Forward  | CCGAAGGATATTGTTGATCCGG    |
| Variant 3 Reverse  | CATCAAAGCTTTGAAGAGCTTGTC  |
| Variant 4 Forward  | ACCAGCCGTATTGTTGCAAGCCTG  |
| Variant 4 Reverse  | CAAAGCTTTGAAGAGCTTG       |
| Variant 5 Forward  | GTGGATGGTTTTATCGATACC     |
| Variant 5 Reverse  | CATCAAAGCTTTGAAGAGCTTGTC  |
| Variant 6 Forward  | CTGGGAAGCTGCTGAAACCCTG    |
| Variant 6 Reverse  | CTGGTCAAAGCTTTGAAGAGCTTG  |
| Variant 7 Forward  | CTGGTTTGATAATGATCATCTGAGC |
| Variant 7 Reverse  | CTGGTCAAAGCTTTGAAGAGCTTG  |
| Variant 8 Forward  | GCAGAAGCTCGAACGTATTG      |
| Variant 8 Reverse  | CAAAGCTTTGAAGAGCTT        |
| Variant 9 Forward  | CTGGCGTCCGAAAACACTGTTTG   |
| Variant 9 Reverse  | CTCGTCAAAGCTTTGAAGAGCTTG  |
| Variant 10 Forward | ACCAGCCGTCCGAAATATCAGTTTG |
| Variant 10 Reverse | CAAAGCTTTGAAGAGCTTG       |

## Supplementary References.

- 1 Wu, T., Hou, J., Adhikari, B. & Cheng, J. Analysis of several key factors influencing deep learning-based inter-residue contact prediction. *Bioinformatics* **36**, 1091-1098, doi:10.1093/bioinformatics/btz679 (2020).
- 2 Micsonai, A. *et al.* BeStSel: webserver for secondary structure and fold prediction for protein CD spectroscopy. *Nucleic Acids Res*, doi:10.1093/nar/gkac345 (2022).
